# Supplementary material for: Engineering the morphology of palladium nanostructures to tune their electrocatalytic activity in formic acid oxidation reactions
Source: Royal Society of Chemistry journal article supplement (doi:10.1039/d0na00798f), 2020-01-01
Supplement: d0na00798f1.pdf [file d0na00798f1.pdf]

## Supporting information

# Engineering the morphology of palladium nanostructures to tune their electrocatalytic activity in formic acid oxidation reactions

*Bulti Pramanick, Trivender Kumar, Aditi Halder\* and Prem Felix Siril\**

School of Basic Science, Indian Institute of Technology Mandi, Himachal Pradesh 175005, India

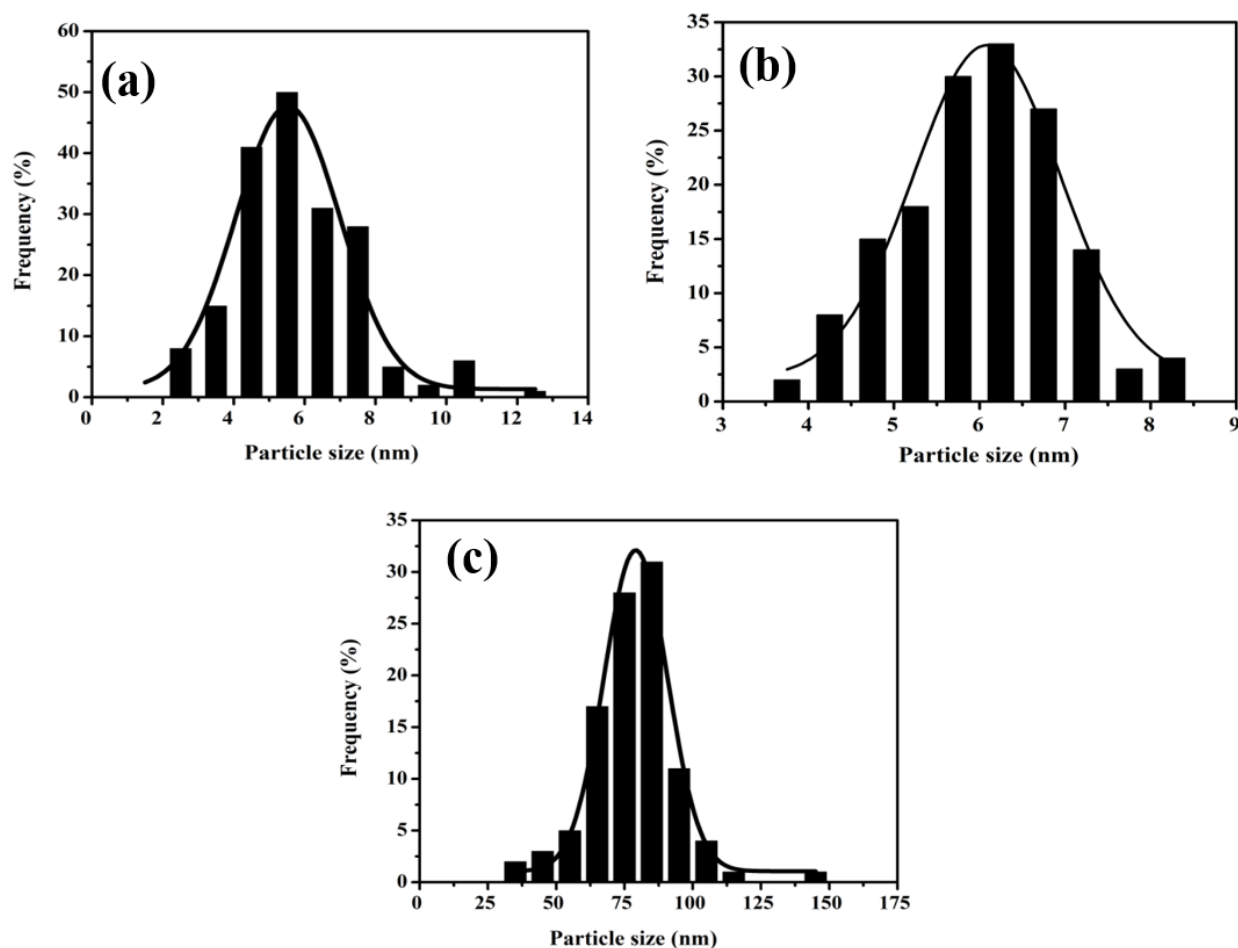

**Figure S1:** Histograms depicting distribution of (a) particle size of Pd<sub>0D</sub> (Z average -  $5.52 \pm 2.76$  nm), (b) diameter of Pd<sub>1D</sub> (Average diameter -  $6.08 \pm 0.86$  nm) and (c) Edge length of Pd<sub>2D</sub> (Z average -  $80 \pm 11.5$  nm) nanostructures.

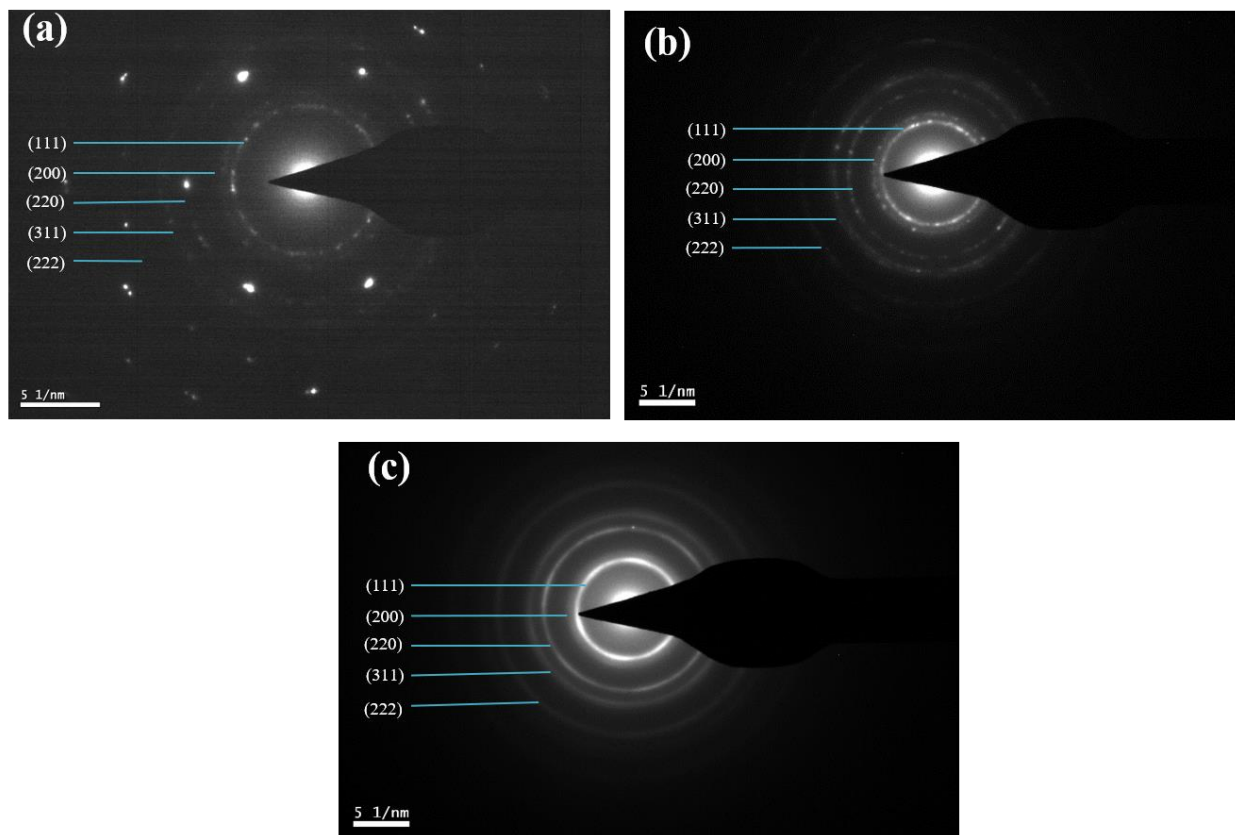

**Figure S2:** Selected area electron diffraction (SAED) pattern of (a) Pd<sub>0D</sub>, (b) Pd<sub>1D</sub> and (c) Pd<sub>2D</sub> nanostructures.

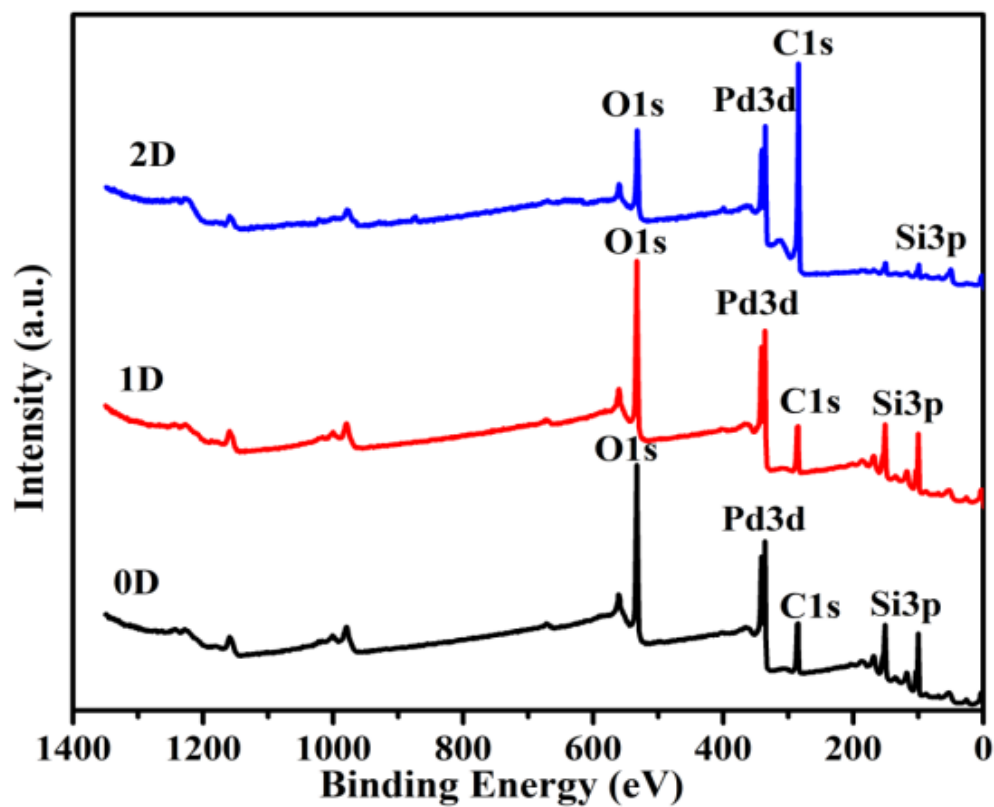

**Figure S3:** X-ray photoemission spectral survey scan of Pd<sub>0D</sub>, Pd<sub>1D</sub> and Pd<sub>2D</sub> nanostructures.

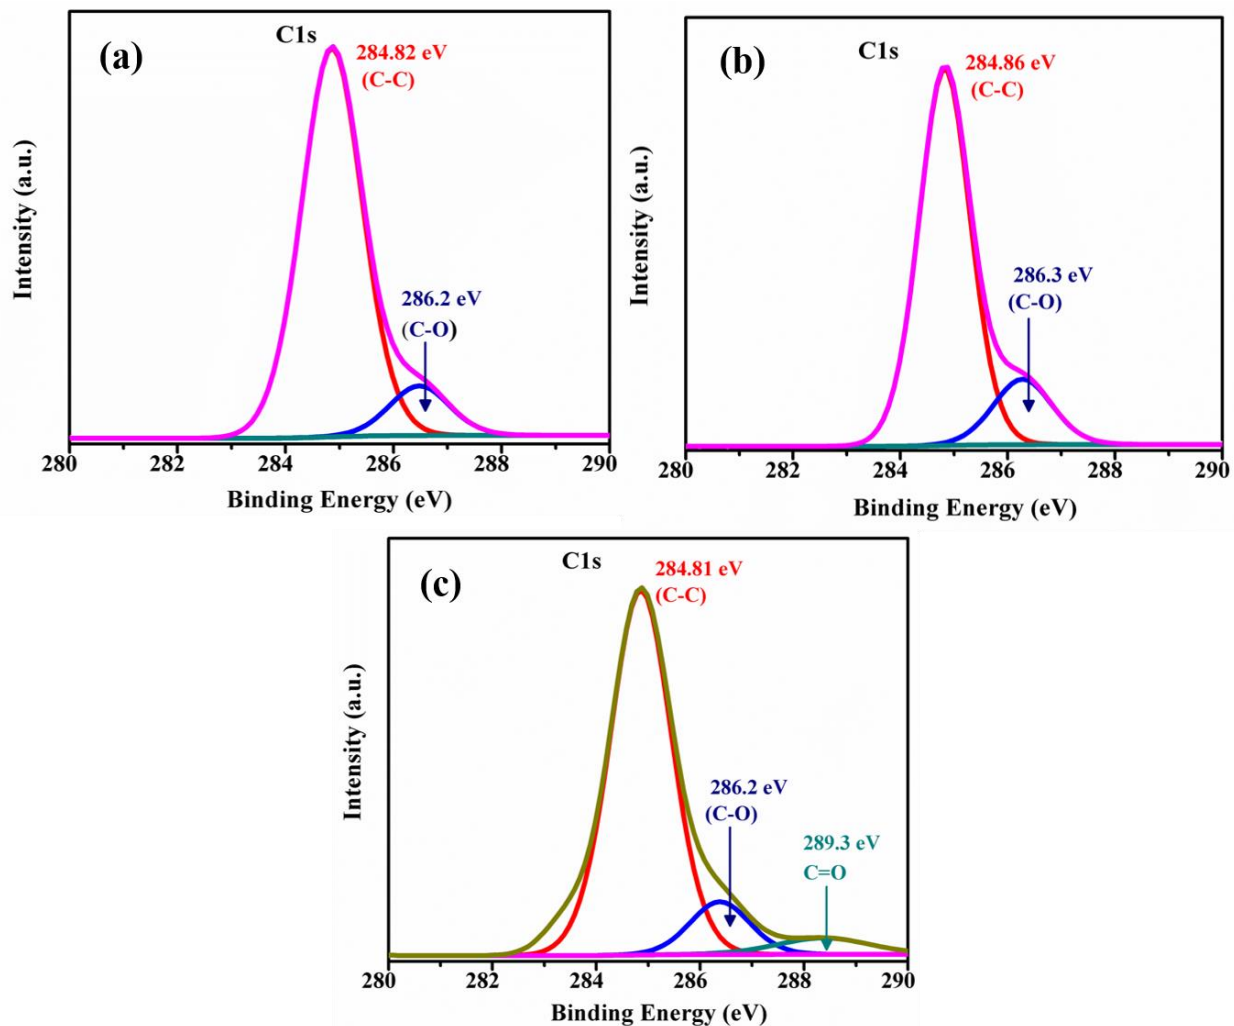

**Figure S4:** XPS of C1s of (a) Pd<sub>0D</sub>, (b) Pd<sub>1D</sub> and (c) Pd<sub>2D</sub> nanostructures.

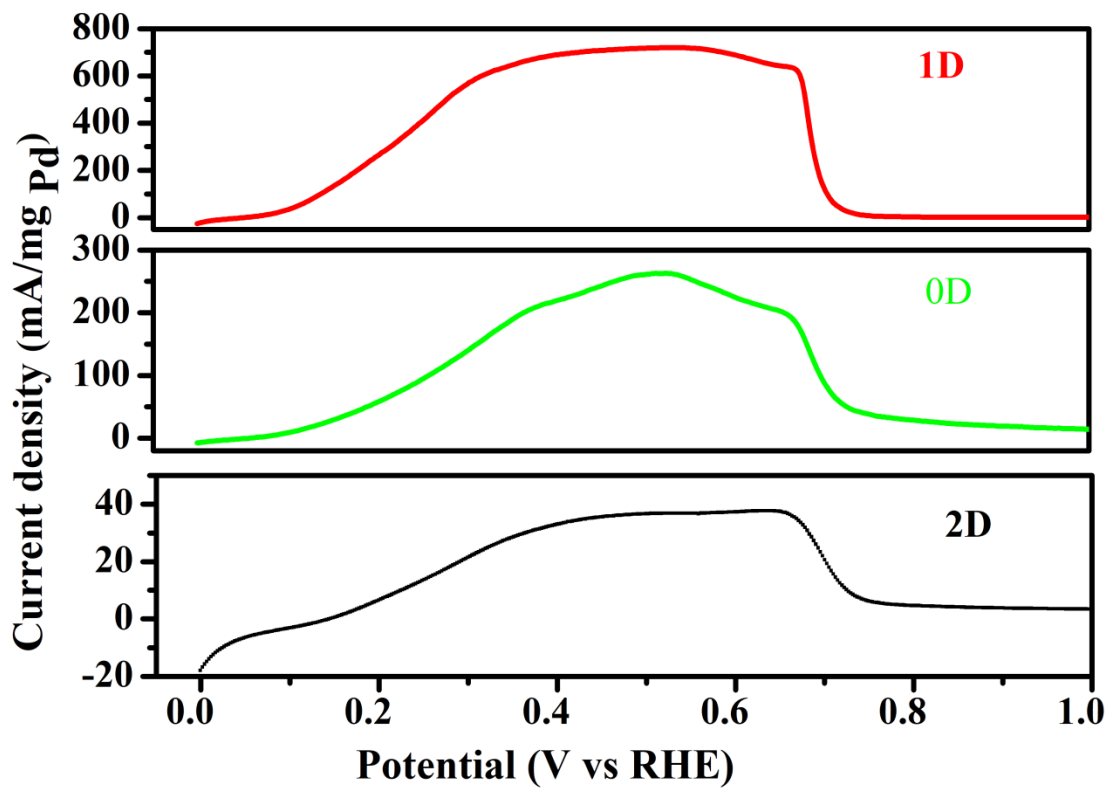

Figure S5: Backward scan for FAOR in presence of the Pd nanostructures as catalysts.

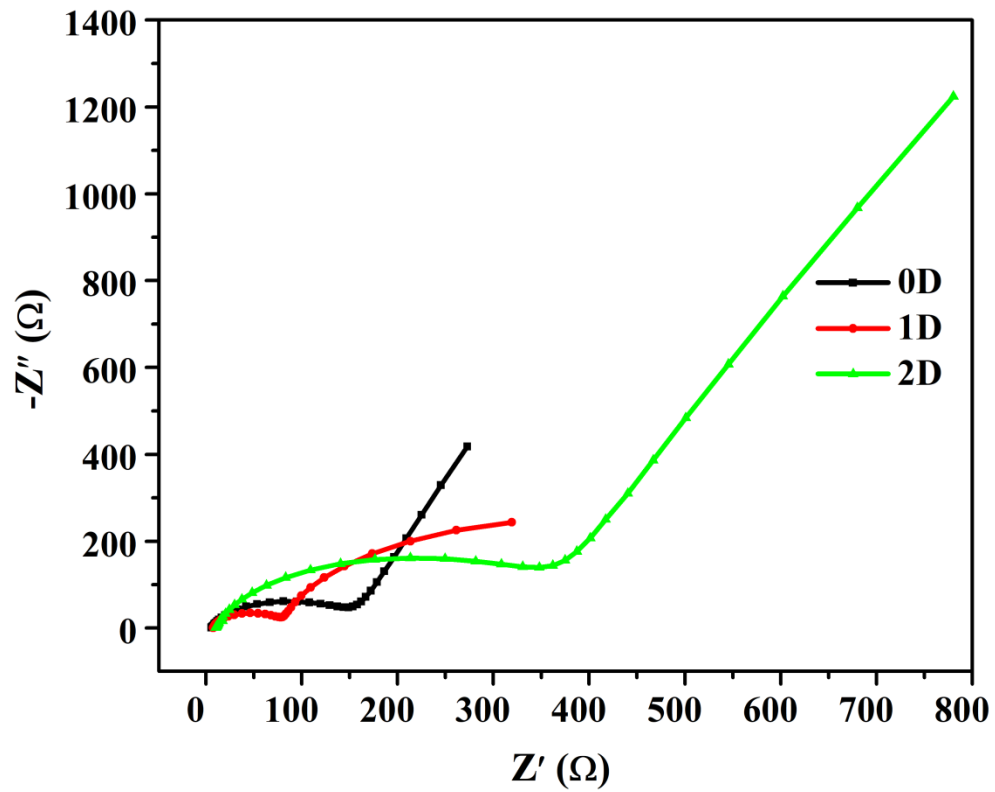

**Figure S6:** Nyquist plots curves recorded in the mixture of 0.5 M  $\text{H}_2\text{SO}_4$  + 0.5 M  $\text{HCOOH}$  solution at the working potential of 0.15 V (vs Ag/AgCl).
